# Supplementary material for: Distinct lipid profile, low-level inflammation, and increased antioxidant defense signature in HIV-1 elite control status
Source: PubMed Central journal article supplement (PMC7892918; doi:10.1016/j.isci.2021.102111), 2021-01-28
Supplement: mmc1.pdf [file mmc1.pdf]

**iScience, Volume 24**

## **Supplemental Information**

**Distinct lipid profile, low-level  
inflammation, and increased antioxidant defense  
signature in HIV-1 elite control status**

**Maïke Sperk, Flora Mikaeloff, Sara Svensson-Akusjärvi, Shuba Krishnan, Sivasankaran  
Munusamy Ponnai, Anoop T. Ambikan, Piotr Nowak, Anders Sönnnerborg, and Ujjwal  
Neogi**

## Supplemental Information

**Fig. S1. Unsupervised PCA of all samples with all metabolites related to Fig 1.** All the samples cluster together except EC06 that was well-separated and is there classified as an outlier. HIV-1 elite controllers are marked orange, HIV-negative control green, and viremic progressors red.

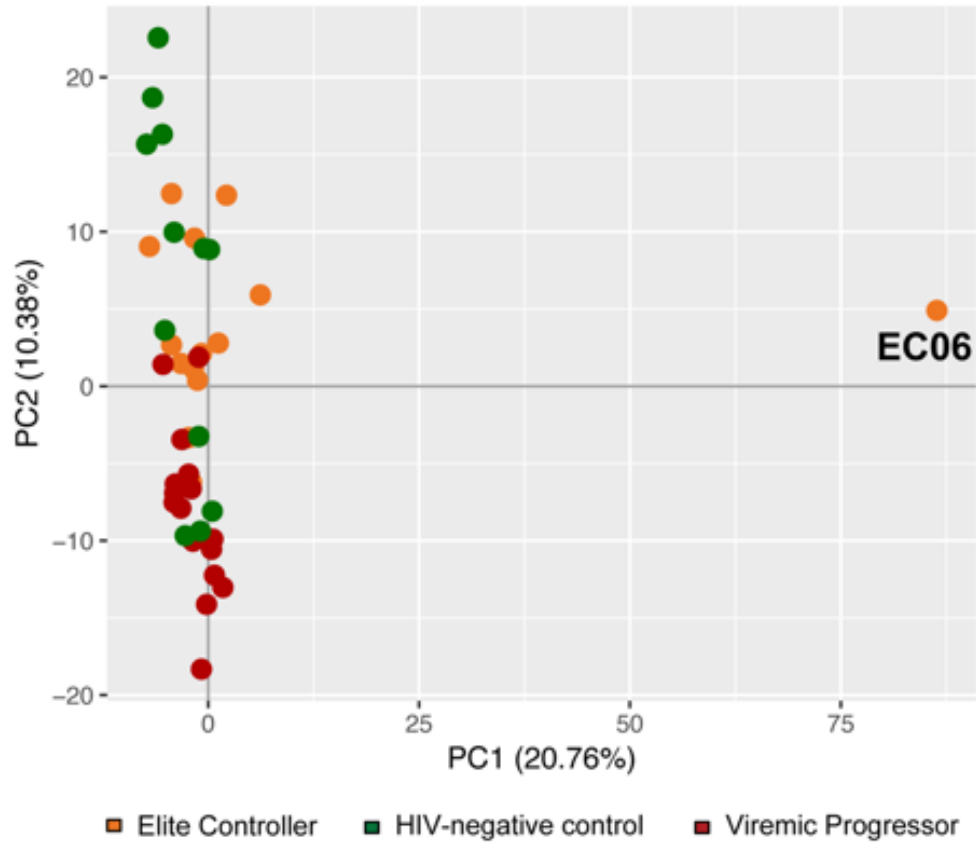

**Fig. S2. Differential expression of the metabolomics data related to Fig 1.** (A-C) Differential expression of the metabolomics data is presented as volcano plots for (A) EC vs VP, (B) VP vs HC, and (C) EC vs HC. Filled red circles are used for metabolites with  $\log_2$ -foldchange smaller than -1.0 and adjusted p-value < 0.05 (equals adj. p-value greater than  $-\log_{10} 1.3$ ). Filled green circles picture metabolites with  $\log_2$ -foldchange greater than 1.0 and adjusted p-value < 0.05. Black filled circles constitute metabolites with  $\log_2$ -foldchange smaller than 1.0 and adjusted p-value < 0.05. Grey filled circles are metabolites with adjusted p-value > 0.05.

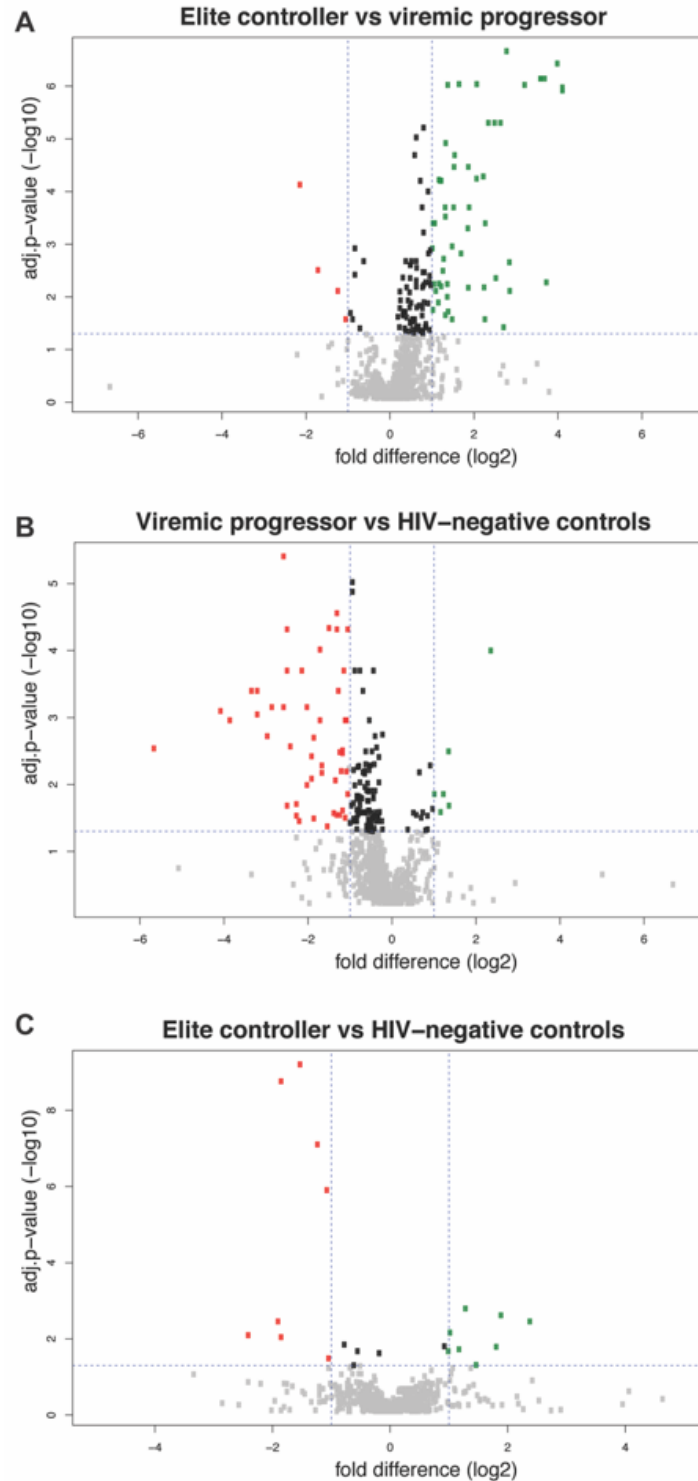

**Fig. S3. Random Forest (RF) analyses related to Fig 2.**

Random Forest (RF) analyses showing the top 30 metabolites that contribute to separation between (A) EC and HC, (B) HC and VP, as well as (C) EC and VP. Affiliation of each metabolite to a certain super pathway is marked by different colours (see colour-coded legend). Biochemicals involved in lipid and amino acids metabolism dominate the top-ranked intermediates for all three comparisons. The table represents predictive accuracy, predicted and actual grouping of the samples.

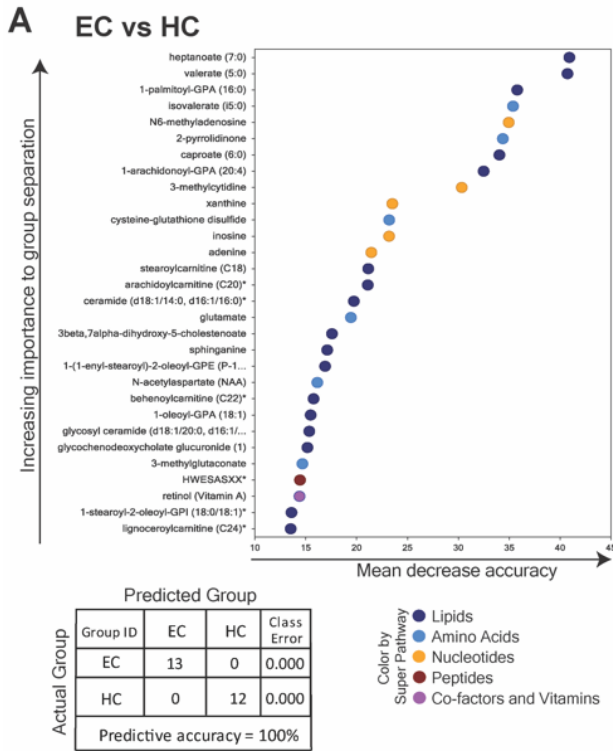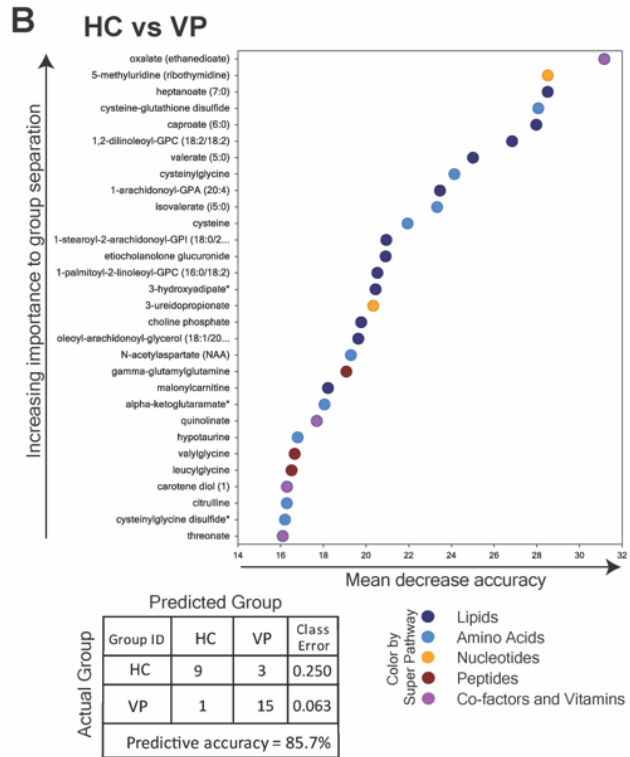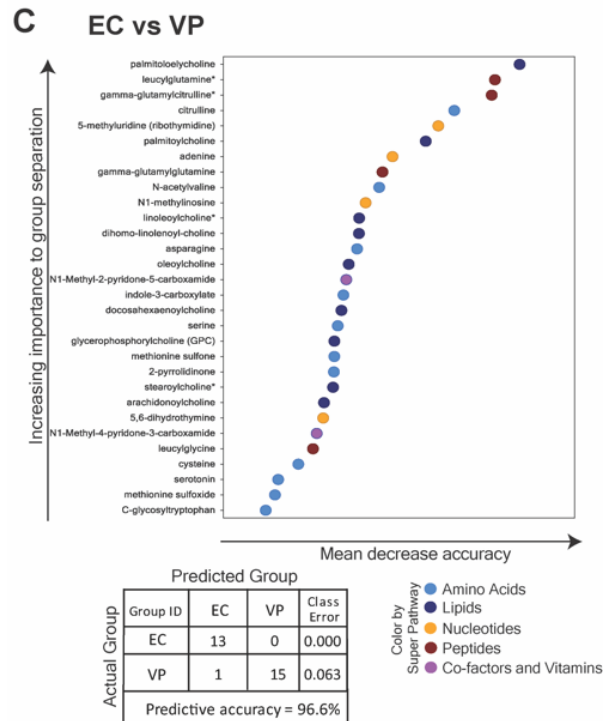

**Fig. S4. Network analyses of the significantly different metabolites related to Fig 3.**

(A and B) Network analyses of the metabolites that were significantly different in (A) EC vs VP (236 metabolites) and (B) VP vs HC respectively (256 metabolites). Rectangular nod shapes represent the eight super pathways that are shown in different colours according to legend. Octagonal nod shapes are used for sub pathways belonging to the eight super pathways. Circular nod shapes show the single metabolites, where red indicates increased levels and green indicates decreased levels. Size of the circles picture p-value: the bigger the size the lower the p-value. Lines connect each metabolite to its respective sub pathway and sub pathway to their respective super pathways.

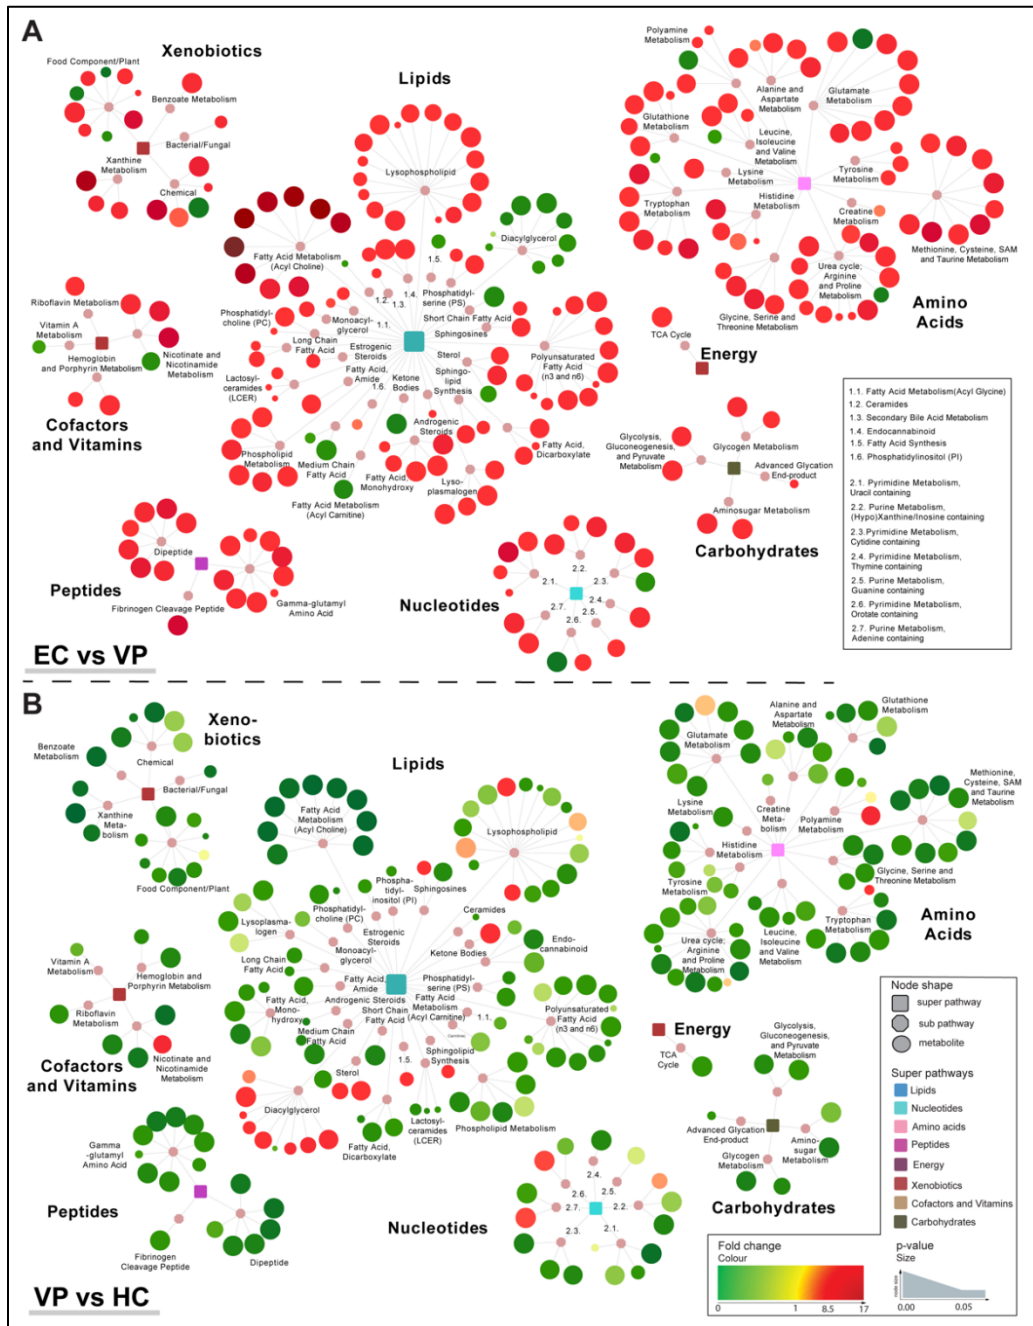

**Fig. S5. Methionine, transsulfuration, and glutathione metabolism related to Fig 4.**

Boxplots showing scaled intensity of 16 selected metabolites that play a role in methionine, transsulfuration, or glutathione metabolism. For all selected biochemicals, EC (orange) have higher levels relative to VP (red); and HC (green) has higher levels than VP for almost all metabolites shown, based on ANOVA contrasts with \*indicating p-value<0.05, \*\*p-value<0.01, and \*\*\*p-value<0.001 respectively. Median values and interquartile ranges are indicated by bars.

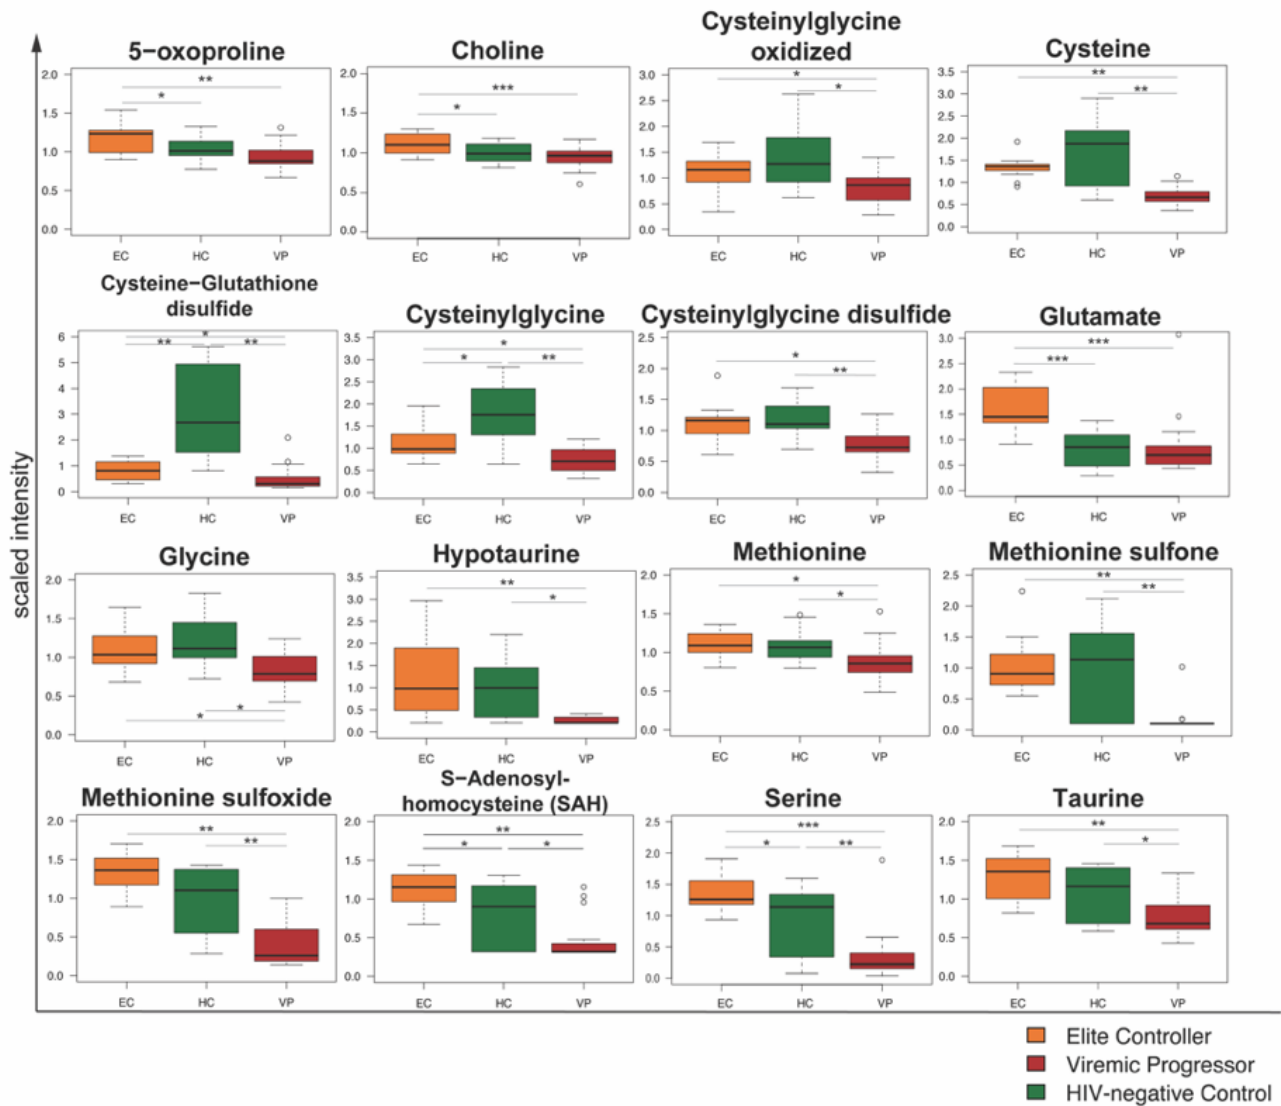

**Fig. S6. Detection of ROS levels and gene expression of NRF2-ARE genes related to Fig 4.**

(A) Dot plots representing MFI of total ROS in PBMC sub-populations (CD4<sup>+</sup> and CD8<sup>+</sup> T-cells, classical, intermediate and non-classical monocytes) measured by FACS of EC (orange) and HC (green) samples. Mann-Whitney test was used to calculate p-values, no significant difference was observed. Median values are indicated by bars.

(B) Dot plots representing gene expression of NRF2-ARE genes in EC (orange) and HC (green). Mann-Whitney test was used to calculate p-values, no significant difference was observed. Median values are indicated by bars.

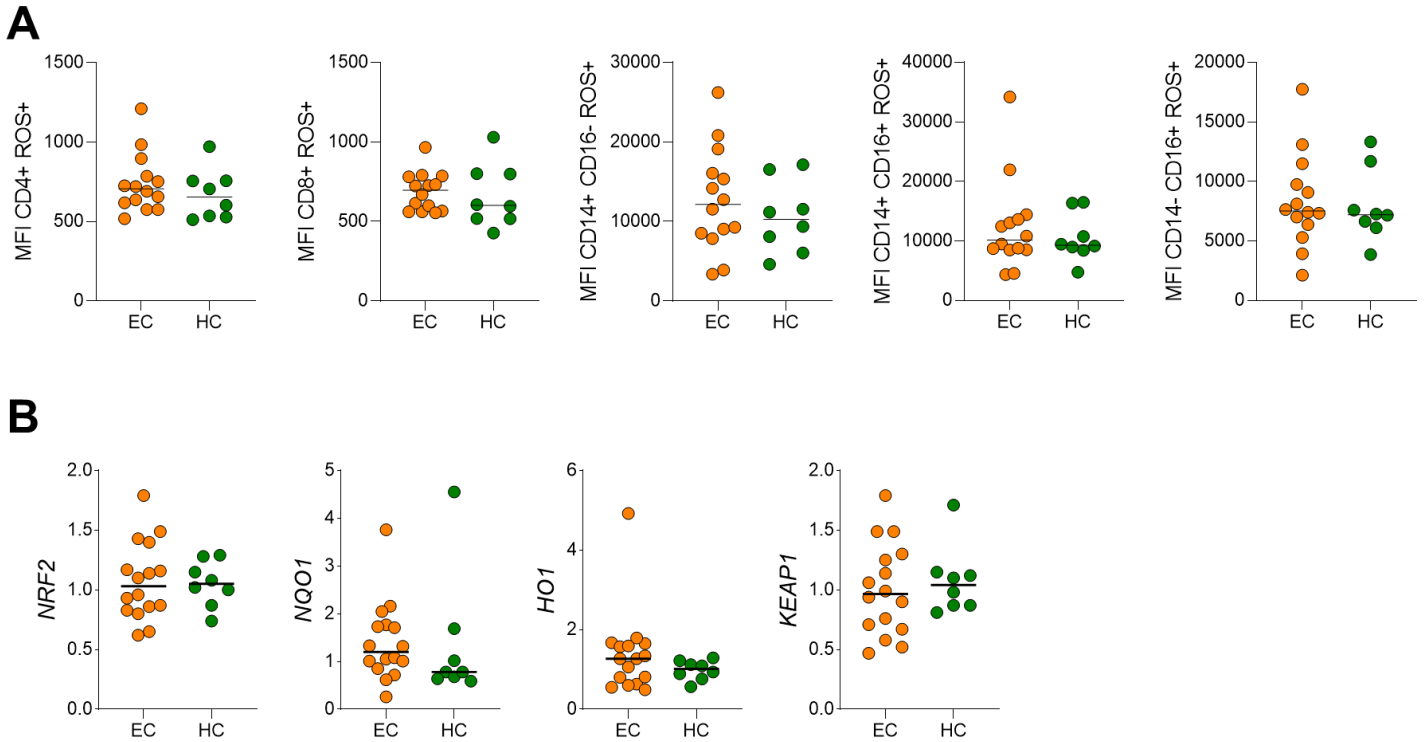

**Fig. S7. Boxplots representing plasma levels of CRP and Neopterin determined by ELISA related to Fig 5.** (A and B) Boxplots representing plasma levels of (A) CRP and (B) Neopterin determined by ELISA for EC (orange), HC (green), and VP (red). Concentrations are given according to unit on y-axis. Mann-Whitney test was used to calculate p-values with \*p-value<0.05, \*\*p-value<0.01, \*\*\*p-value<0.001. Median values and interquartile ranges are indicated by bars.

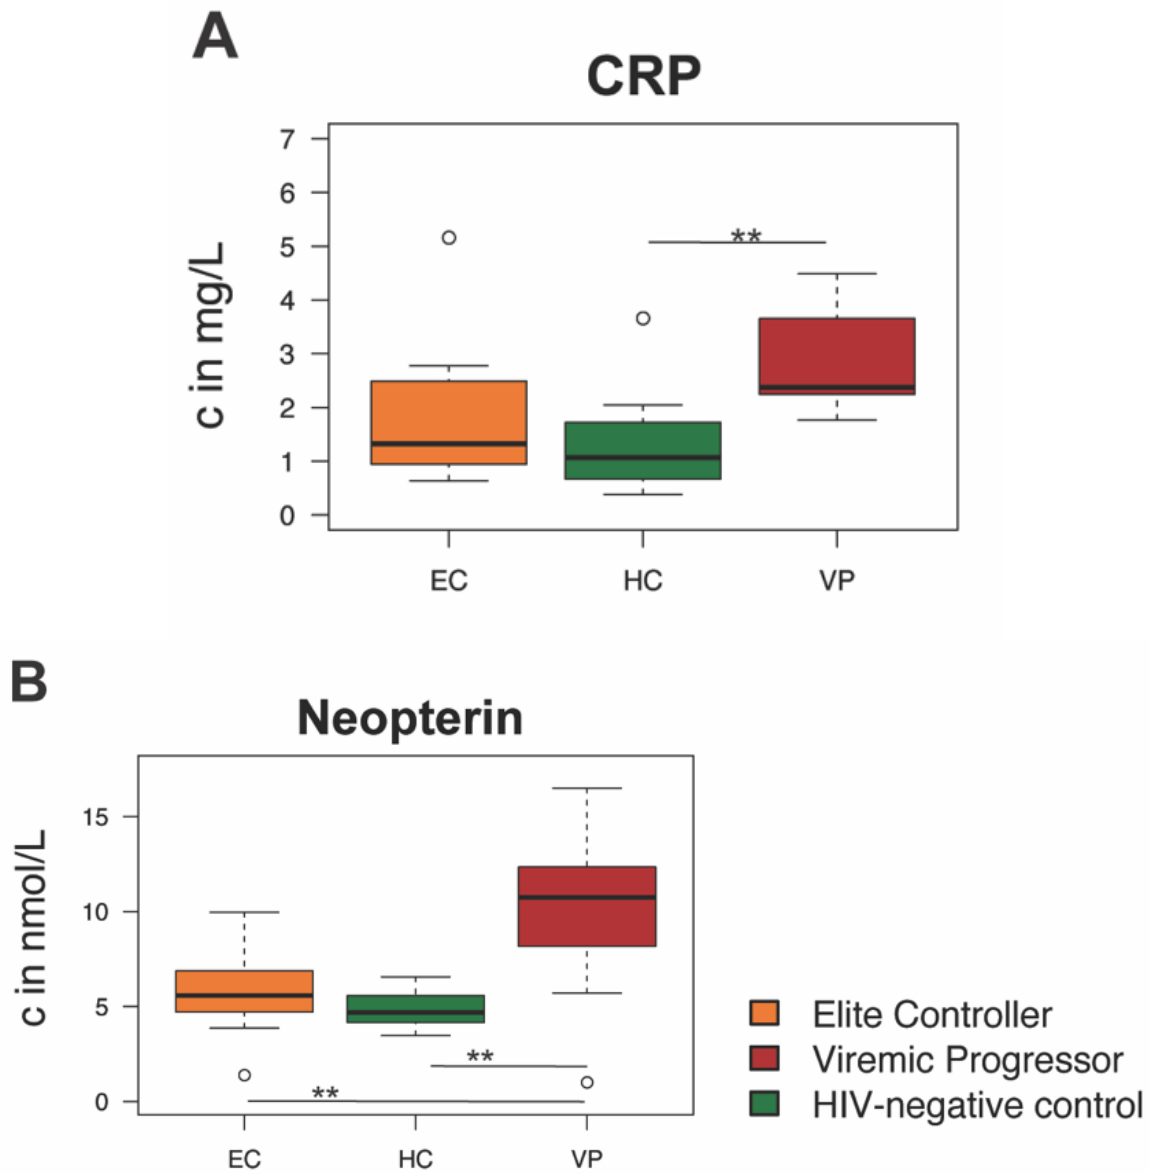



**Fig. S8. Additional figures of flow cytometry data analyses related to Fig 6.**

(A) Boxplots represent expression frequency of selected surface receptors on different cell populations for EC (orange) and HC (green). Median values and interquartile ranges are indicated by bars. P-values are determined by Mann-Whitney U test with \* indicating  $p$ -value $<0.05$  and \*\* $p$ -value $<0.01$ . (B) t-SNE plots illustrating differences between EC (upper plot) and HC (lower plot) in surface expression of the nine targeted surface markers CD3, CD4, CD8, CD14, CD16, CCR2, CCR3, CCR5, and CCR6 respectively. The plots show t-SNE dimension 1 and t-SNE dimension 2. Blue colour shows low expression, green intermediate expression, and red high expression. Prior analysis, viable singlet cells of each sample were downsampled to 10,000 and individual downsampled samples of EC and HC respectively were concatenated. t-SNE analysis was performed with 2,000 iterations with perplexity of 20 and learning rate of 1,000.

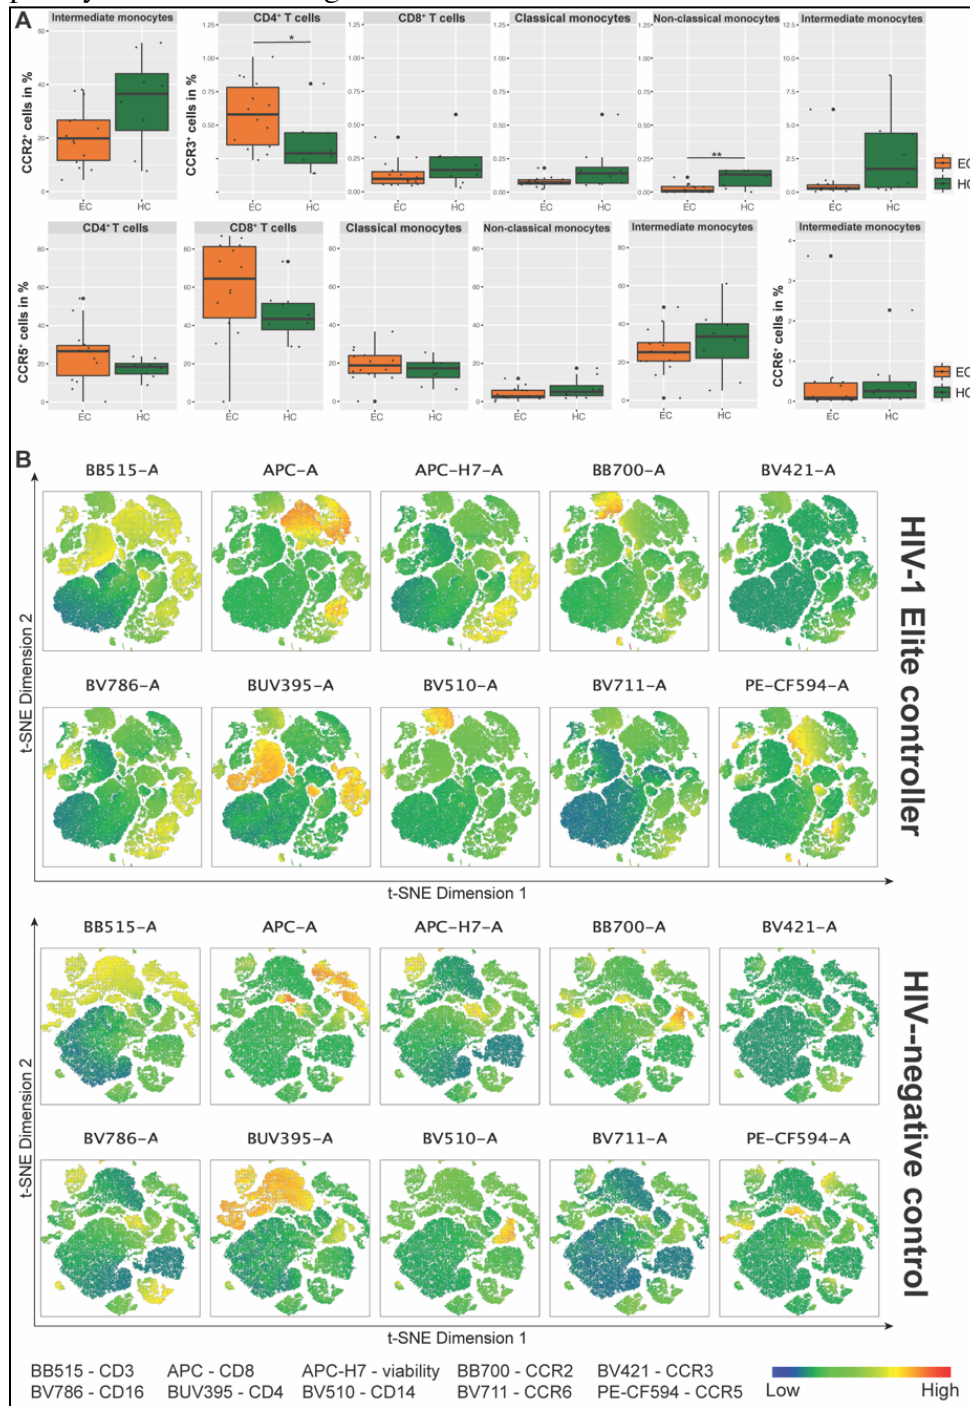

**Fig. S9. Gating strategy of flow cytometry data related to Fig 6.**

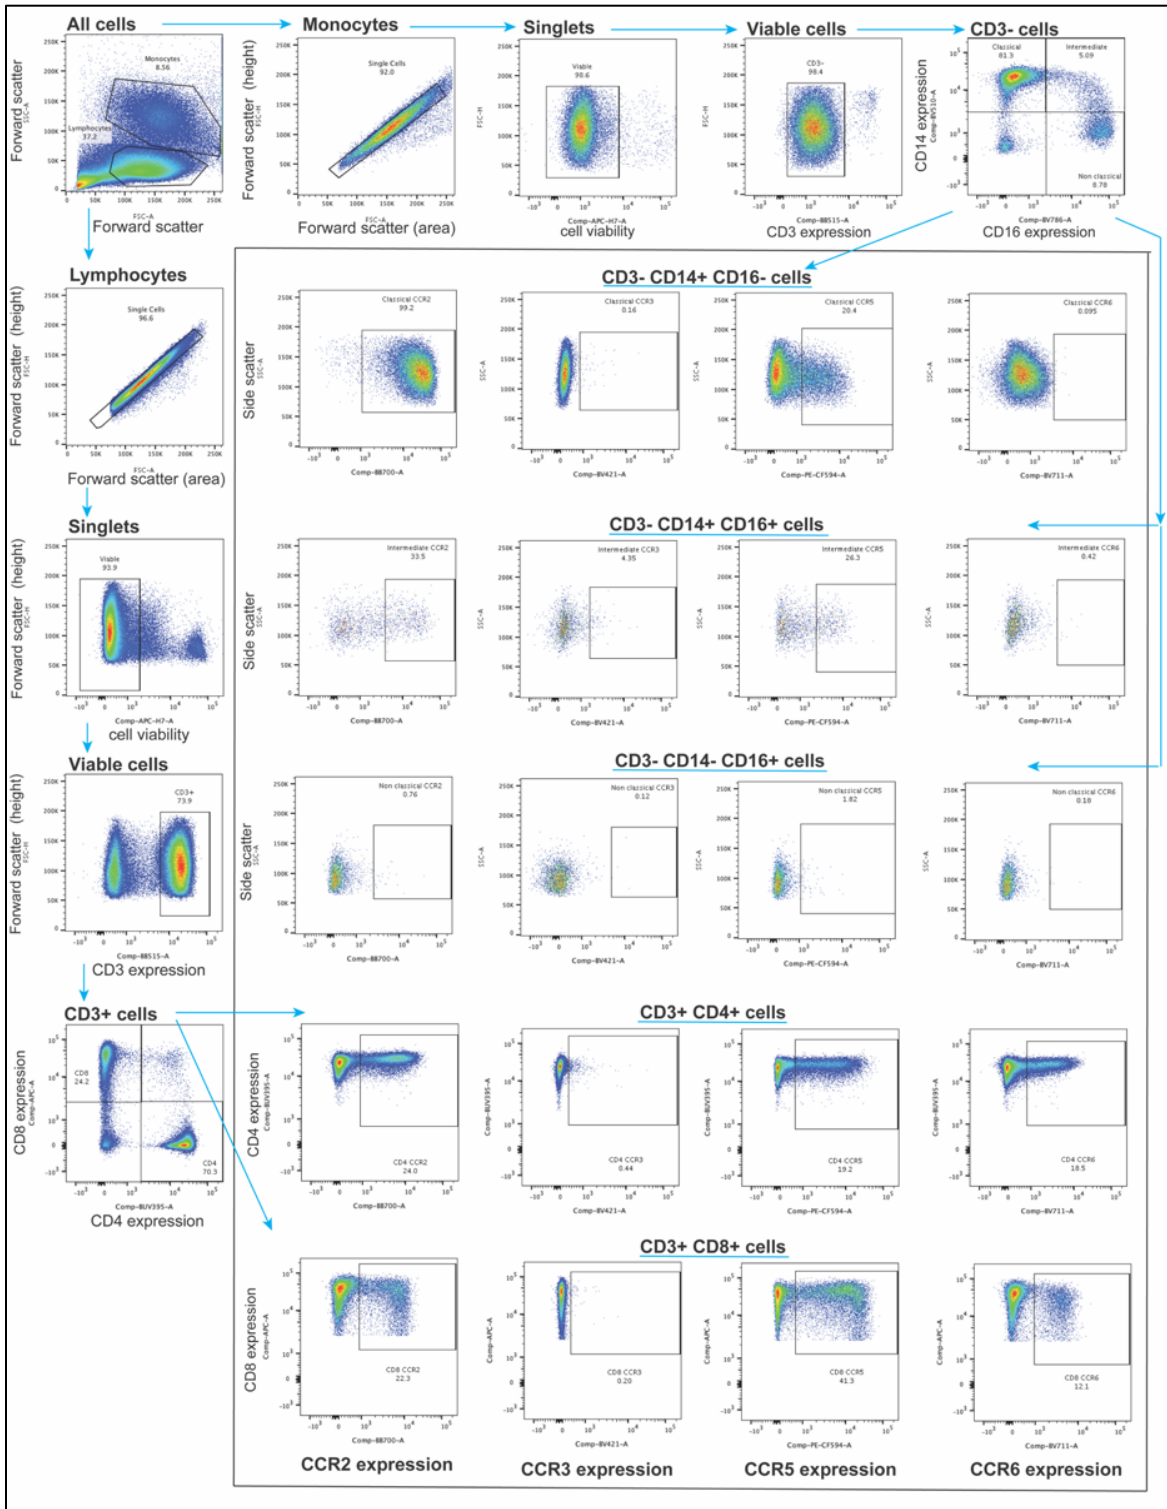

**Table S1.** Gamma-glutamyl amino acids related to Fig 4. Table with 17 metabolites belonging to the sub pathway of gamma-glutamyl amino acids that have been detected in metabolomics analyses. Foldchange between two study groups is given in column 3-5 with (EC vs HC, VP vs HC, and EC vs VP) with respective p-value and q-value in rows 6-11. Foldchange written in yellow numbers indicates statistical significance (p-value<0.05) with green cells marking downregulation and red cells marking upregulation. ANOVA contrasts were used to calculate p-values as well as q-values.

|                                  | EC<br>HC                       | VP<br>HC | EC<br>VP | EC / HC |         | VP / HC |         | EC / VP |         |        |
|----------------------------------|--------------------------------|----------|----------|---------|---------|---------|---------|---------|---------|--------|
|                                  |                                |          |          | p-value | q-value | p-value | q-value | p-value | q-value |        |
| <b>Gamma-glutamyl Amino Acid</b> | gamma-glutamylalanine          | 0,74     | 0,93     | 0,80    | 0,8396  | 0,7597  | 0,2943  | 0,3069  | 0,1994  | 0,4138 |
|                                  | gamma-glutamylglutamate        | 1,44     | 0,72     | 1,99    | 0,1498  | 0,4043  | 0,0405  | 0,0982  | 0,0006  | 0,0060 |
|                                  | gamma-glutamylglutamine        | 1,14     | 0,36     | 3,18    | 0,3049  | 0,5370  | 0,0000  | 0,0000  | 0,0000  | 0,0000 |
|                                  | gamma-glutamylglycine          | 1,09     | 0,60     | 1,83    | 0,5986  | 0,6679  | 0,0029  | 0,0181  | 0,0005  | 0,0053 |
|                                  | gamma-glutamylhistidine        | 0,99     | 0,81     | 1,21    | 0,8598  | 0,7687  | 0,0675  | 0,1305  | 0,0410  | 0,1473 |
|                                  | gamma-glutamylisoleucine       | 1,08     | 0,96     | 1,12    | 0,3872  | 0,5681  | 0,9177  | 0,5780  | 0,4109  | 0,6104 |
|                                  | gamma-glutamylleucine          | 0,93     | 0,90     | 1,04    | 0,7045  | 0,7203  | 0,4278  | 0,3788  | 0,6841  | 0,7543 |
|                                  | gamma-glutamyl-alpha-lysine    | 0,96     | 0,74     | 1,30    | 0,8940  | 0,7813  | 0,0181  | 0,0566  | 0,0223  | 0,0948 |
|                                  | gamma-glutamyl-epsilon-lysine  | 1,14     | 0,96     | 1,20    | 0,3125  | 0,5391  | 0,6012  | 0,4591  | 0,1100  | 0,2925 |
|                                  | gamma-glutamylmethionine       | 1,03     | 0,65     | 1,57    | 0,6890  | 0,7111  | 0,0007  | 0,0063  | 0,0001  | 0,0021 |
|                                  | gamma-glutamylphenylalanine    | 0,93     | 0,97     | 0,96    | 0,5009  | 0,6269  | 0,6362  | 0,4763  | 0,8109  | 0,7932 |
|                                  | gamma-glutamylthreonine        | 1,14     | 0,57     | 1,98    | 0,3026  | 0,5343  | 0,0025  | 0,0164  | 0,0001  | 0,0013 |
|                                  | gamma-glutamyltryptophan       | 1,03     | 0,71     | 1,45    | 0,7795  | 0,7421  | 0,0005  | 0,0052  | 0,0002  | 0,0021 |
|                                  | gamma-glutamyltyrosine         | 1,04     | 0,99     | 1,05    | 0,8064  | 0,7513  | 0,7870  | 0,5288  | 0,5904  | 0,7162 |
|                                  | gamma-glutamylvaline           | 1,04     | 1,08     | 0,97    | 0,7799  | 0,7421  | 0,3307  | 0,3256  | 0,4846  | 0,6664 |
|                                  | gamma-glutamylcitrulline       | 1,32     | 0,31     | 4,26    | 0,1526  | 0,4060  | 0,0000  | 0,0001  | 0,0000  | 0,0000 |
|                                  | gamma-glutamyl-2-aminobutyrate | 1,05     | 0,83     | 1,27    | 0,6107  | 0,6698  | 0,4100  | 0,3688  | 0,1689  | 0,3861 |

## TRANSPARENT METHODS

### *Human subjects*

Human plasma samples were obtained from three groups of individuals: untreated HIV-1-infected individuals with viremia (viremic progressor, VP, n=16) or without viremia (EC, n=14) and HIV-negative individuals (herein mentioned as HIV-negative controls, HC, n=12). Study groups consist of female and male individuals and have comparable gender proportions. Samples are age- and BMI-matched and are part of the InfCareHIV cohort from Karolinska University Hospital, Huddinge, Sweden. Peripheral blood mononuclear cells (PBMCs) were used from a subpopulation of these subjects (EC n=14 and HC n=8). EC was defined as being infected with HIV-1 for more than a year with  $\geq 3$  consecutive viral loads (VL)  $< 75$  RNA copies/ml blood (and all previous VL  $< 1000$  RNA copies/ml) or as having a known HIV-1-infection for at least ten years with two or more VL measurements of which 90% were below 400 RNA copies/mL. Patients' characteristics are given in Table S2.

The study is approved by the Swedish Ethical Review Authority with ethical permit Dnr 2013/1944-31/4 and amendment Dnr 2019-05585. Written informed consent was obtained from all study participants prior to inclusion in the study. Patients identities were anonymized before analysis.

**Table S2. Patients' clinical and demographic characteristics related to Fig 1A.** P-values were determined by either (a) Kruskal Wallis Test or (b) chi square test. Routes of sexual transmissions are: transmission through blood donation product (BDPT), heterosexual transmission (HET), men who have sex with men (MSM), other transmission route (OTR), people who inject drugs (PWID), information not available (NA). BMI, body mass index.

|                                                          | EC                  | VP                  | HC                  | p-value    |
|----------------------------------------------------------|---------------------|---------------------|---------------------|------------|
| <b>Sample size, n</b>                                    | 14                  | 16                  | 12                  |            |
| <b>Age, median (IQR)</b>                                 | 45.5 (40.25-50.50)  | 45.0 (40.75-53.25)  | 44.00 (42.00-46.50) | 0.7008 (a) |
| <b>Gender, female, n</b>                                 | 7 (50)              | 7 (43.75)           | 6 (50)              |            |
| <b>BMI, median (IQR)</b>                                 | 26.40 (24.80-32.23) | 26.00 (23.75-30.50) | 23.00 (21.45-25.50) | 0.0537 (a) |
| <b>Route of transmission / Sexual orientation, n (%)</b> |                     |                     |                     |            |
| <b>BDPT</b>                                              | 2 (14.29)           |                     |                     | 0.393 (b)  |
| <b>HET</b>                                               | 8 (57.14)           | 10 (62.5)           | 5 (41.67)           |            |
| <b>MSM</b>                                               | 3 (21.43)           | 4 (25.00)           | -                   |            |
| <b>OTR</b>                                               | 1 (7.14)            | -                   | -                   |            |
| <b>PWID</b>                                              | -                   | 2 (12.5)            |                     |            |
| <b>NA</b>                                                | -                   | -                   | 7 (58.33)           |            |
| <b>HIV-1 subtype, n (%)</b>                              |                     |                     |                     |            |
| <b>A</b>                                                 |                     | 2 (12.5)            |                     | 0.5509 (b) |
| <b>A1</b>                                                |                     | 1 (6.25)            |                     |            |
| <b>B</b>                                                 | 2 (14.29)           | 2 (12.5)            |                     |            |
| <b>C</b>                                                 | 4 (28.57)           | 3 (18.75)           |                     |            |
| <b>CRF</b>                                               | 1 (7.14)            | 2 (12.5)            |                     |            |
| <b>NA</b>                                                | 7 (50)              | 6 (37.5)            |                     |            |

## **METHOD DETAILS**

### ***Metabolomics***

Metabolomic profiling was performed at Metabolon, Inc. (North Carolina, USA) with non-targeted mass spectrometry (MS) analysis as described recently (Babu et al., 2019). Briefly, samples were first prepared with an automated MicroLab STAR system (Hamilton Company) and then analyzed by four ultra-high-performance liquid chromatography-tandem mass spectrometry according to Metabolon pipeline. Biochemical components were identified based on retention time/index (RI), mass to charge ratio (m/z), and chromatographic data (MS/MS spectral data) by comparison to the Metabolon reference library that consists of more than 3300 compounds. The method is ISO 9001:2015 certified and the lab is accredited by the College of American Pathologist (CAP), USA. The metabolites were mapped with the life-style and environmental factors as reported recently (Bar et al., 2020).

### ***Network analyses***

Metabolites and pathways networks were created with Cytoscape ver 3.6.1(Shannon et al., 2003). For each metabolite, fold change and p-value and q-value from the Mann-Whitney U test were added to network template file. Nodes are connected objects in the network and edges connections between nodes. Metabolites are linked to subpathways and subpathways to superpathways. Gradient color and size were applied to metabolites nodes depending on fold-change.

### ***Targeted plasma proteomics***

Plasma samples were analyzed using proximity extension assay (PEA) as described earlier(Zhang et al., 2018). Olink Immuno-Oncology panel was applied that includes 92 plasma proteins (Olink Bioscience, RRID:SCR\_003899, Cat# 95310). In addition, enzyme-linked immunosorbent assay (ELISA) was performed for neopterin (TECAN, Cat# Cat# RE59321), C-reactive protein (CRP, R&D systems, Cat# DCRP00), and CCL20 (R&D Systems, Cat# DM3A00) as per manufacturer's instruction.

### ***Flow cytometry***

PBMCs of 14 EC and 8 HC were subjected to flow cytometry analyses. Samples were thawed, washed with flow cytometry buffer (PBS with 2% fetal bovine serum and 2mM EDTA) and stained for cell surface markers for 20 minutes at room temperature. The following antibodies were used: FITC mouse anti-human CD3 (BioLegend Cat# 317306, RRID:AB\_571907), APC mouse anti-human CD8a (BioLegend Cat# 301014, RRID:AB\_314132), PerCP anti-human CD8a (BioLegend Cat# 300922, RRID: AB\_1575072), Brilliant Violet 510 mouse anti-human CD14 (BioLegend Cat# 301842, RRID:AB\_2561946), Brilliant Violet 421 mouse anti-human CD193 (CCR3) (BioLegend Cat# 310714, RRID: AB\_2561886), and Brilliant Violet 711 mouse anti-human CD196 (CCR6) (BioLegend Cat# 353436, RRID:AB\_2629608) as well as BUV395 mouse anti-human CD4 (BD Biosciences Cat# 563550, RRID:AB\_2738273), BV786 mouse anti-human CD16 (BD Biosciences Cat# 563690, RRID:AB\_2744299), BB700 mouse anti-human CCR2 (BD Biosciences, Cat# 747847, RRID:AB\_2861365),

and PE-CF594 Mouse Anti Human CD195 (CCR5) (BD Biosciences Cat# 562456, RRID: AB\_11154599). All stainings were complemented with Live/Dead fixable near IR dye (Invitrogen, Cat# L10119). Cellular ROS levels were measured using CellROX™ Deep Red Flow Cytometry Assay Kit according to manufacturer's instructions (Invitrogen, Cat# C10491). A detailed list of antibodies used is provided in the key resources table. After antibody incubation, cells were washed with flow cytometry buffer and fixed with 2% paraformaldehyde for 15 minutes at room temperature. Acquisition was performed on BD FACS Symphony (BD Bioscience, USA) using lasers and filter settings as indicated for BUV395, BV421, BV510, BV711, BV786, PerCP, FITC, BB700, PE-CF594, APC and Near IR respectively; 355nm UV (100mW) 379/28, 405nm violet (100mW), 450/50, 525/50 (505 LP), 710/50 (685 LP), 810/40 (770 LP), 488nm blue (200mW) 670/30 (635 LP), 530/30 (505 LP), 710/50 (685 LP), 561nm Y/G (200mW), 610/20 (600LP) and 637nm Red (140mW), 670/30 and 780/60 (750LP). Flow cytometry analysis was performed using FlowJo 10.6.2 (TreeStar, Inc, Ashland, OR) and visualization of complex data using Spice(Roederer et al., 2011). A gating strategy is provided in Fig. S9. Expression frequency and levels of selected surface markers are represented as boxplots using ggplot2 R packages. T-distributed Stochastic Neighbor Embedding (t-SNE) analysis was conducted in FlowJo 10.6.1 with 2,000 iterations, 20 perplexities and a learning rate of 1,000.

### ***RT-qPCR Analysis***

RNA was extracted using TRI Reagent (Zymo Research, Cat# R2050-1-200) and Direct-zol™ RNA Miniprep kit according to manufacturer's instructions (Zymo Research, Cat# R2050, R2052). cDNA was synthesized using SuperScript™ IV reverse transcriptase (Thermofisher Scientific, Cat# 18090010), supplemented with Random Hexamer Primer (Thermofisher Scientific, Cat# SO142), dNTP Mix (Thermofisher Scientific, Cat# R0192) and RNasin® Ribonuclease Inhibitor (Promega, Cat# N2511). qPCR reactions were performed using KAPA SYBR Fast qPCR kit (KAPA Biosystems, Cat# KK4602) with primers targeting *NRF2* (Fwd: 5'-CACATCCAGTCAGAAACCAGTGG-3' and Rev: 5'-GGAATGTCTGCGCCAAAAGCTG-3'), *KEAPI* (Fwd: 5'-GAGCGCCTGGACGTAGAACCG-3' and Rev: 5'-GCTGCGAGTCCGAGGTCTTCC-3'), *HOI* (Fwd: 5'-ACAAGGAGAGCCCAGTCTTC-3' and Rev: 5'-AGACAGGTCACCCAGGTAGC-3'), *NQO1* (Fwd: 5'-CCTCTATGCCATGAACTT-3' and Rev: 5'-TATAAGCCAGAACAGACTC-3') and Actin (Fwd: 5'-GAGGGAAATCGTGCGTGACA-3' and Rev: 5'-AATAGTGATGACCTGGCCGT-3') on an ABI Fast 7500 system (Applied Biosystems) according to manufacturer's protocol. Gene expression analysis was performed using the  $\Delta\Delta$ CT method and visualized using GraphPad Prism 8 (GraphPad Software Inc.).

### ***Data visualization***

Figures were prepared with Adobe Illustrator v24.

### ***Statistical analyses of metabolomics data***

Doughnut charts with detected metabolites were created in Microsoft Excel. One-way ANOVA was performed to identify biochemicals that differed notably between groups ( $p \leq 0.05$ ). For multi-group comparison, a false discovery rate (FDR) adjusted  $q \leq 0.05$  was utilized. In unsupervised analyses, volcano plots were used to visualize similarities and differences between sample groups. Further, principal component analyses (PCA) were performed to picture how individual samples differ from each other. The supervised classification technique Random Forest (RF) was applied to determine which biochemicals make the largest contribution to group classification. Based on the top 30 ranked metabolites from RF analyses that contribute to group separation, supervised hierarchical clustering analyses (HCA) were performed in R with gplots R package (RCoreTeam, 2020; Warnes et al., 2005) and a heatmap was generated by Pearson distance method. Supervised PCA was executed in R by ggplot2 R package (RCoreTeam, 2020; Wickham, 2016). Correlation analyses of metabolomics data were performed in R (RCoreTeam, 2020) with stats package, spearman correlations between specific sets of metabolites in EC. Boxplots of selected metabolites that are included in the correlation analyses were created in R (RCoreTeam, 2020) and show median and interquartile range.

### ***Data exclusion***

Regarding the metabolomics data, the sample EC06 was classified as an outlier and was excluded from further analyses of the metabolomics data. See also Figure S1.

### ***Statistical analyses of proteomics data***

Given data distribution, non-parametric Kruskal–Wallis H test was applied to extract proteins differing at least two groups (false discovery rate (FDR)  $< 0.05$ ). Partial Least Squares Discriminant Analysis (PLS-DA) was performed using selected proteins using R package ropls (RCoreTeam, 2020; Thévenot et al., 2015). Two-sided Mann-Whitney U Tests were carried out using R between two different conditions (FDR  $< 0.05$ ). Identified proteins are represented as boxplots using ggplot2 R package (RCoreTeam, 2020; Wickham, 2016) showing median and interquartile range.

### ***Statistical analyses of flow cytometry data***

Statistical analyses of flow cytometry data were performed with Prism 8 (GraphPad Software Inc.). Two-sided Mann-Whitney U Test was used to make statistical comparisons between two study groups. Boxplots were created in R using ggplot2 R package (RCoreTeam, 2020; Wickham, 2016) and show median and interquartile range.

### ***Statistical details***

Statistical details of the experiments can be found in the figure legends. Significance was defined as  $p\text{-value} < 0.05$ .

## KEY RESOURCES TABLE

| REAGENT or RESOURCE                                               | SOURCE                                           | IDENTIFIER                                                                                          |
|-------------------------------------------------------------------|--------------------------------------------------|-----------------------------------------------------------------------------------------------------|
| <b>Antibodies</b>                                                 |                                                  |                                                                                                     |
| FITC mouse anti-human CD3 (clone OKT3)                            | BioLegend                                        | Cat# 317306, RRID:AB_571907                                                                         |
| BUV395 mouse anti-human CD4 (Clone SK3)                           | BD Biosciences                                   | Cat# 563550, RRID:AB_2738273                                                                        |
| APC mouse anti-human CD8a (clone RPA-T8)                          | BioLegend                                        | Cat# 301014, RRID: AB_314132                                                                        |
| PerCP anti-human CD8a (clone HIT8a)                               | BioLegend                                        | Cat# 300922, RRID: AB_1575072)                                                                      |
| Brilliant Violet 510 mouse anti-human CD14 (clone M5E2)           | BioLegend                                        | Cat# 301842, RRID:AB_2561946                                                                        |
| BV786 mouse anti-human CD16 (clone 3G8)                           | BD Biosciences                                   | Cat# 563690, RRID:AB_2744299                                                                        |
| BB700 mouse anti-human CCR2 (CD192) (clone 1D9)                   | BD Biosciences                                   | Catalog No. 747847, RRID:AB_2861365                                                                 |
| Brilliant Violet 421 mouse anti-human CD193 (CCR3) (clone 5E8)    | BioLegend                                        | Cat# 310714, RRID: AB_2561886                                                                       |
| PE-CF594 Mouse Anti Human CD195 (CCR5) (clone 2D7/CCR5)           | BD Biosciences                                   | Cat# 562456, RRID: <a href="#">AB_11154599</a>                                                      |
| Brilliant Violet 711 mouse anti-human CD196 (CCR6) (clone G034E3) | BioLegend                                        | Cat# 353436, RRID:AB_2629608                                                                        |
| LIVE/DEAD Fixable Near-IR Stain                                   | Invitrogen                                       | Cat# L10119                                                                                         |
| CellROX™ Deep Red Flow Cytometry Assay Kit                        | Invitrogen                                       | Cat# C10491                                                                                         |
| <b>Biological Samples</b>                                         |                                                  |                                                                                                     |
| Human plasma samples                                              | Karolinska University Hospital, Huddinge, Sweden |                                                                                                     |
| Human PBMC samples                                                | Karolinska University Hospital, Huddinge, Sweden |                                                                                                     |
| <b>Critical Commercial Assays</b>                                 |                                                  |                                                                                                     |
| Proximity Extension Assay (PEA) Immuno-Oncology Panel             | Olink Bioscience, RRID:SCR_003899                | Cat# 95310                                                                                          |
| Human C-Reactive Protein/CRP Quantikine ELISA Kit                 | R&D Systems                                      | Cat# DCRP00                                                                                         |
| Human CCL20/MIP-3 alpha Quantikine ELISA Kit                      | R&D Systems                                      | Cat# DM3A00                                                                                         |
| Neopterin ELISA                                                   | TECAN                                            | Cat# RE59321                                                                                        |
| <b>Deposited Data</b>                                             |                                                  |                                                                                                     |
| Metabolomics                                                      | This paper                                       | Supplementary (Table S3)                                                                            |
| Proteomics                                                        | Zhang et al, 2018; This paper                    |                                                                                                     |
| Flow cytometry                                                    | This paper                                       | Flow Repository ID: <a href="#">FR-FCM-Z2T3</a>                                                     |
| Code                                                              | This paper                                       | <a href="https://github.com/neogilab/METABO-EC">https://github.com/neogilab/METABO-EC</a>           |
| <b>Software and Algorithms</b>                                    |                                                  |                                                                                                     |
| GraphPad Prism v8                                                 |                                                  | <a href="https://www.graphpad.com">https://www.graphpad.com</a>                                     |
| R                                                                 | R Core Team 2020                                 | <a href="https://www.r-project.org/">https://www.r-project.org/</a>                                 |
| ggplot2 R package                                                 | Wickham et al, 2016                              | <a href="https://CRAN.R-project.org/package=ggplot2">https://CRAN.R-project.org/package=ggplot2</a> |
| Ropls R package                                                   | Thevenot et al, 2015                             | <a href="https://bioconductor.org/packages/ropls/">https://bioconductor.org/packages/ropls/</a>     |
| gplots R package                                                  | Warnes et al, 2005                               | <a href="https://CRAN.R-project.org/package=gplots">https://CRAN.R-project.org/package=gplots</a>   |
| Stats R package                                                   | R Core Team 2020                                 | <a href="https://www.r-project.org/">https://www.r-project.org/</a>                                 |
| Cytoscape v3.6.1                                                  | Shannon et al, 2003                              | <a href="https://cytoscape.org/">https://cytoscape.org/</a>                                         |
| FlowJo™ v10                                                       |                                                  | <a href="https://www.flowjo.com/">https://www.flowjo.com/</a>                                       |



|                       |                      |                                                                             |
|-----------------------|----------------------|-----------------------------------------------------------------------------|
| Spice                 | Roederer et al, 2011 | <a href="https://niaid.github.io/spice/">https://niaid.github.io/spice/</a> |
| Adobe Illustrator v24 |                      | <a href="https://www.adobe.com">https://www.adobe.com</a>                   |

## SUPPLEMENTARY REFERENCE

- Babu, H., Sperk, M., Ambikan, A.T., Rachel, G., Viswanathan, V.K., Tripathy, S.P., Nowak, P., Hanna, L.E., and Neogi, U. (2019). Plasma Metabolic Signature and Abnormalities in HIV-Infected Individuals on Long-Term Successful Antiretroviral Therapy. *Metabolites* 9.
- Bar, N., Korem, T., Weissbrod, O., Zeevi, D., Rothschild, D., Leviatan, S., Kosower, N., Lotan-Pompan, M., Weinberger, A., Le Roy, C.I., *et al.* (2020). A reference map of potential determinants for the human serum metabolome. *Nature* 588, 135-140.
- RCoreTeam (2020). R: A language and environment for statistical computing. R Foundation for Statistical Computing (Vienna, Austria).
- Roederer, M., Nozzi, J.L., and Nason, M.C. (2011). SPICE: exploration and analysis of post-cytometric complex multivariate datasets. *Cytometry A* 79, 167-174.
- Shannon, P., Markiel, A., Ozier, O., Baliga, N.S., Wang, J.T., Ramage, D., Amin, N., Schwikowski, B., and Ideker, T. (2003). Cytoscape: a software environment for integrated models of biomolecular interaction networks. *Genome research* 13, 2498-2504.
- Thévenot, E.A., Roux, A., Xu, Y., Ezan, E., and Junot, C. (2015). Analysis of the Human Adult Urinary Metabolome Variations with Age, Body Mass Index, and Gender by Implementing a Comprehensive Workflow for Univariate and OPLS Statistical Analyses. *Journal of Proteome Research* 14, 3322-3335.
- Warnes, G., Bolker, B., Bonebakker, L., Gentleman, R., Huber, W., Liaw, A., Lumley, T., Mächler, M., Magnusson, A., and Möller, S. (2005). *gplots: Various R programming tools for plotting data*, Vol 2.
- Wickham, H. (2016). *ggplot2. Elegant Graphics for Data Analysis* (New York: Springer International Publishing).
- Zhang, W., Ambikan, A.T., Sperk, M., van Domselaar, R., Nowak, P., Noyan, K., Russom, A., Sonnerborg, A., and Neogi, U. (2018). Transcriptomics and Targeted Proteomics Analysis to Gain Insights Into the Immune-control Mechanisms of HIV-1 Infected Elite Controllers. *EBioMedicine* 27, 40-50.
